# Calcium and ZmCCaMK are involved in brassinosteroid-induced antioxidant defense in maize leaves

Jingwei Yan<sup>1,3</sup>, Li Guan<sup>1,3</sup>, Yue Sun<sup>1</sup>, Yuan Zhu<sup>1</sup>, Lei Liu<sup>1</sup>, Rui Lu<sup>1</sup>, Mingyi Jiang<sup>1,2</sup>, Mingpu Tan<sup>1</sup> and Aying Zhang<sup>1,\*</sup>

<sup>1</sup>College of Life Sciences, Nanjing Agricultural University, Nanjing 210095, China

<sup>2</sup>National Key Laboratory of Crop Genetics and Germplasm Enhancement, Nanjing Agricultural University, Nanjing 210095, China

<sup>3</sup>These authors contributed equally to this work.

\*Corresponding author: E-mail, ayzhang@njau.edu; Fax, +86-25-84396542.

(Received September 28, 2014; Accepted January 26, 2015)

Brassinosteroids (BRs) have been shown to enhance stress tolerance by inducing antioxidant defense systems. However, the mechanisms of BR-induced antioxidant defense in plants remain to be determined. In this study, the role of calcium (Ca<sup>2+</sup>) and maize calcium/calmodulin-dependent protein kinase (CCaMK), ZmCCaMK, in BR-induced antioxidant defense, and the relationship between ZmCCaMK and Ca<sup>2+</sup> in BR signaling were investigated. BR treatment led to a significant increase in cytosolic Ca<sup>2+</sup> concentration in protoplasts from maize mesophyll, and Ca<sup>2+</sup> was shown to be required for BR-induced antioxidant defense. Treatment with BR induced increases in gene expression and enzyme activity of ZmCCaMK in maize leaves. Transient overexpression and silencing of *ZmCCaMK* in maize protoplasts demonstrated that ZmCCaMK was required for BR-induced antioxidant defense. The requirement for CCaMK was further investigated using a loss-of-function mutant of *OsCCaMK*, the orthologous gene of *ZmCCaMK* in rice. Consistent with the findings in maize, BR treatment could not induce antioxidant defense in the rice *OsCCaMK* mutant. Furthermore, Ca<sup>2+</sup> was required for BR-induced gene expression and activation of ZmCCaMK, while ZmCCaMK was shown to enhance the BR-induced increase in cytosolic Ca<sup>2+</sup> concentration. Moreover, our results also showed that ZmCCaMK and H<sub>2</sub>O<sub>2</sub> influenced each other. These results indicate that Ca<sup>2+</sup> works together with ZmCCaMK in BR-induced antioxidant defense, and there are two positive feedback loops between Ca<sup>2+</sup> or H<sub>2</sub>O<sub>2</sub> and ZmCCaMK in BR signaling in maize.

**Keywords:** Antioxidant defense • Brassinosteroid • Calcium • Calcium/calmodulin-dependent protein kinase • H<sub>2</sub>O<sub>2</sub> • Maize.

**Abbreviations:** APX, ascorbate peroxidase; BR, brassinosteroid; BRz, brassinazole; CaM, calmodulin; CAT, catalase; CCaMK, calcium/calmodulin-dependent protein kinase; DAB, 3,3'-diaminobenzidine; DMTU, 3-(3,4-dichlorophenyl)-1,1-dimethylurea; DPI, diphenyleioidonium; dsRNA, double-stranded RNA; Fluo-3/AM, Fluo-3 acetoxymethyl ester; GR, glutathione reductase; H<sub>2</sub>DCF-DA, 2,7-dichlorofluorescein diacetate; LSCM, laser scanning

confocal microscopy; MAPK, mitogen-activated protein kinase; PEG, polyethylene glycol; qRT-PCR, real-time quantitative reverse transcription-PCR; RNAi, RNA interference; ROS, reactive oxygen species; SOD, superoxide dismutase; YFP, yellow fluorescent protein.

## Introduction

Brassinosteroids (BRs) are a family of growth-promoting steroidal plant hormones that are found at low levels in pollen, seeds and young vegetative tissues throughout the plant kingdom. Genetic studies in *Arabidopsis* have illustrated the essential roles of BRs in a wide range of developmental processes and helped to identify many genes involved in BR biosynthesis and signal transduction (Li and Chory 1999, Bajguz 2007, Kim and Wang 2010, Choudhary et al. 2012, Fàbregas et al. 2013). In addition, BRs have been demonstrated to alleviate various biotic and abiotic stress effects (Kagale et al. 2007, Wang 2012). BR enhanced the tolerance to oxidative, cadmium, salinity and copper stresses, which was accompanied by the accumulation of hydrogen peroxide (H<sub>2</sub>O<sub>2</sub>) and the enhancement of antioxidant enzymes, including superoxide dismutase (SOD), catalase (CAT), ascorbate peroxidase (APX), glutathione peroxidase (GPX) and glutathione reductase (GR) (Xia et al. 2009, Choudhary et al. 2010, Zhang et al. 2010, Zhang et al. 2011, Ahammed et al. 2013, Hayat et al. 2014). H<sub>2</sub>O<sub>2</sub>, nitric oxide (NO), NADPH oxidase and mitogen-activated protein kinase (MAPK) are required for BR-induced antioxidant defense in plants (Xia et al. 2009, Zhang et al. 2010, Zhang et al. 2011, Zhu et al. 2013). However, the detailed mechanisms of BR-induced antioxidant defense remain unclear.

Calcium (Ca<sup>2+</sup>) is a universal second messenger, and the concentration of cytosolic Ca<sup>2+</sup> represent a central hub where multiple signal transduction pathways intersect (McAinsh et al. 2009, Dodd et al. 2010, Kudla et al. 2010, Monshausen 2012). In plants, various stimuli, such as salinity, drought, cold, heat shock, ABA, H<sub>2</sub>O<sub>2</sub> and pathogen elicitors, trigger changes in the concentration of cytosolic Ca<sup>2+</sup>, and the transient Ca<sup>2+</sup> elevations are recognized by several Ca<sup>2+</sup> sensors such as calmodulin (CaM), calcium-dependent protein kinase

(CDPK) and calcineurin B-like protein (CBL) (Luan et al. 2002, Yang and Poovaliah 2003, Harper and Harmon 2005, DeFalco et al. 2010, Hashimoto and Kudla 2011, Batistič and Kudla 2012, Schulz et al. 2013). In spite of extensive studies on  $\text{Ca}^{2+}$  signaling, little is currently known about the involvement of  $\text{Ca}^{2+}$  in BR signaling. A recent study showed that exogenously applied BR caused an elevation in the concentration of cytosolic  $\text{Ca}^{2+}$  in Arabidopsis (Zhao et al. 2013), suggesting a new function for  $\text{Ca}^{2+}$  in BR signaling. However, it is not clear how  $\text{Ca}^{2+}$  is translated into specific responses in BR signaling.

Calcium/calmodulin-dependent protein kinase (CCaMK) is a strong decoder of  $\text{Ca}^{2+}$  spiking. This protein is characterized by a serine/threonine kinase domain, a CaM-binding domain and three EF-hand motifs that potentially bind  $\text{Ca}^{2+}$ , and its activity is subject to dual regulation by  $\text{Ca}^{2+}$  and CaM (Gleason et al. 2006, Tirichine et al. 2006, Yang et al. 2007, Hayashi et al. 2010). CCaMKs have been isolated from lily, tobacco, maize, rice, wheat, *Lotus japonicus*, *Medicago truncatula* and *Sesbania rostrata* (Harper et al. 2004, Levy et al. 2004, Mitra et al. 2004, Chen et al. 2007, Capoen et al. 2009, Hayashi et al. 2010, Yang et al. 2011), and a growing amount of evidence reveals their functions in plants. For example, CCaMK has been demonstrated to be a key regulator of root nodule and arbuscular mycorrhizal symbioses (Levy et al. 2004, Mitra et al. 2004, Gleason et al. 2006, Chen et al. 2007, Hayashi et al. 2010, Shimoda et al. 2012), and has also been shown to be involved in responses to abiotic stress (Yang et al. 2011, Ma et al. 2012, Shi et al. 2012, Shi et al. 2014). The wheat CCaMK gene *TaCCaMK* was regulated by ABA, NaCl and polyethylene glycol (PEG) treatments in wheat seedling roots. More recent studies also showed that ABA and PEG could induce the expression and activity of CCaMK, and CCaMK is required for ABA-induced antioxidant defense in the leaves of rice and maize (Ma et al. 2012, Shi et al. 2012, Shi et al. 2014). BRs and ABA can co-regulate the expression of hundreds of genes (Nemhauser et al. 2006), and they interact physiologically in controlling many developmental processes (Steber and McCourt 2001, Chen et al. 2004, Finkelstein et al. 2008, Gao et al. 2008) and stress responses (Zhang et al. 2011). Therefore, it is reasonable to hypothesize that CCaMK may be involved in BR signaling. In the present study, this hypothesis was tested and the results showed that ZmCCaMK is involved in BR signaling and is required for BR-induced antioxidant defense.  $\text{Ca}^{2+}$  plays an important role in gene expression and activation of ZmCCaMK, and ZmCCaMK also in turn influences the cytosolic  $\text{Ca}^{2+}$  concentration in BR signaling.

## Results

### $\text{Ca}^{2+}$ is required for BR-induced antioxidant defense

$\text{Ca}^{2+}$  is a universal second messenger that acts as a mediator of stimulus–response coupling in eukaryotes (Oh et al. 2012). Here, the effect of BR on the concentration of cytosolic  $\text{Ca}^{2+}$  was investigated. To visualize cytosolic  $\text{Ca}^{2+}$ , protoplasts were prepared from mesophyll from leaves, loaded with Fluo-3

acetoxymethyl ester (Fluo-3/AM), a  $\text{Ca}^{2+}$ -sensitive fluorescent probe (Zhang et al. 1998), and subsequently treated with 10 nM BR, and observed by laser scanning confocal microscopy (LSCM). As shown in Fig. 1, the concentration of cytosolic  $\text{Ca}^{2+}$  increased rapidly and reached a maximum after 6 min of treatment, which was nearly 2-fold higher than untreated protoplasts.

To determine further whether BR-induced  $\text{Ca}^{2+}$  is involved in BR-induced antioxidant defense, the  $\text{Ca}^{2+}$  chelator EGTA and  $\text{Ca}^{2+}$  channel blocker  $\text{LaCl}_3$  were used. BR treatment induced significant increases in the activities of APX and SOD, which were almost completely blocked by pre-treatment with EGTA or  $\text{LaCl}_3$ , and these pre-treatments alone did not affect the activities of APX and SOD (Fig. 2). These results suggest that  $\text{Ca}^{2+}$  is required for BR-induced antioxidant defense in maize leaves.

### BR induces increases in gene expression and activity of ZmCCaMK in maize leaves

CCaMK is an important decoder of  $\text{Ca}^{2+}$ . In order to determine the possible involvement of ZmCCaMK in BR signaling, the effect of BR on the induction of ZmCCaMK was investigated. The expression of *ZmCCaMK* and the activity of ZmCCaMK in maize leaves were measured using quantitative real-time PCR analysis and immunocomplex kinase activity assay, respectively. Treatments with BR (10 nM) induced rapid increases in gene expression and the activity of ZmCCaMK (Fig. 3A–C). A biphasic response in the expression of *ZmCCaMK* was observed, in which the first peak of *ZmCCaMK* expression occurred after 30 min of BR treatment, then decreased, and the second peak of *ZmCCaMK* expression occurred after 120 min of BR treatment (Fig. 3A). Similar biphasic responses were observed in the expression of *ZmCCaMK* in maize mesophyll protoplasts (Fig. 3B) and in the activity of ZmCCaMK in maize leaves (Fig. 3C). The BR-induced activation of ZmCCaMK occurred in a dose-dependent manner in the concentration range of 5–20 nM BR (Fig. 3D).

To investigate whether the expression of *ZmCCaMK* and the activity of ZmCCaMK can be induced by endogenous BR, the specific BR biosynthesis inhibitor brassinazole (Brz) (Asami et al. 2001) was used. PEG treatment induced increases in expression of *ZmCCaMK* and activity of ZmCCaMK in maize leaves (Fig. 3E). Pre-treatment with Brz significantly inhibited the PEG-induced expression of *ZmCCaMK* and the activity of ZmCCaMK, which were restored by the application of exogenous BR (10 nM), while Brz pre-treatment alone had no effect on the expression of *ZmCCaMK* or the activity of ZmCCaMK (Fig. 3F). These results indicate that endogenous BR up-regulates the expression of *ZmCCaMK* and the activity of ZmCCaMK in leaves of maize plants in response to PEG.

### ZmCCaMK is involved in BR-induced antioxidant defense

To investigate further whether ZmCCaMK mediates the BR-induced antioxidant defense in maize, we used a transient gene expression and a transient gene silencing analysis in

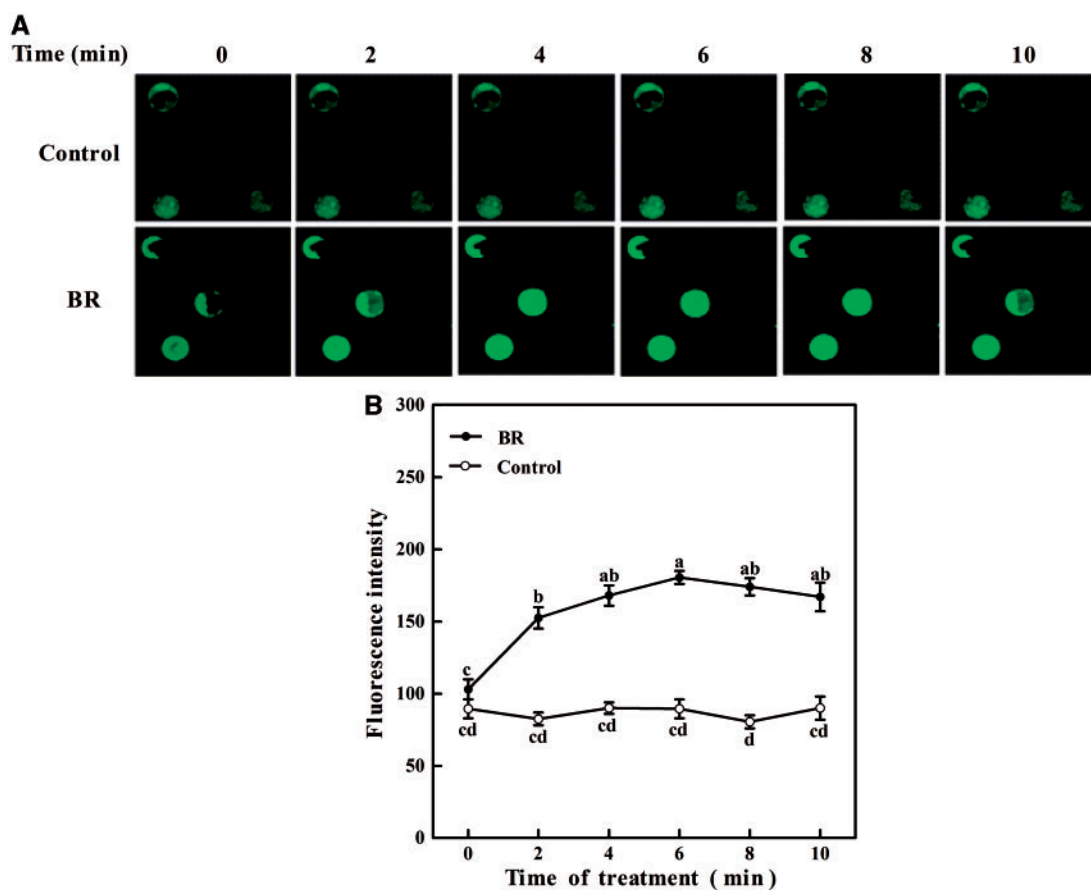

**Fig. 1** BR-induced changes in cytosolic calcium concentration in protoplasts of maize (*Zea mays*) mesophyll cells. (A) Confocal images of maize mesophyll protoplasts loaded with Fluo-3/AM. The protoplasts were treated with culture medium (Control) or 10 nM BR (BR), and were observed by laser scanning confocal microscopy (LSCM). Experiments were repeated at least three times with similar results. (B) Changes in fluorescence intensity. The fluorescence intensity was measured by fluorescence microscopy and calculated as the average value of those obtained by scanning >50 protoplasts from three different experiments. Means denoted by the same letter did not differ significantly at  $P < 0.05$  according to Duncan's multiple range test.

protoplasts (Yoo et al. 2007, Zhai et al. 2009). This method has been shown to be suitable for functional analysis of plant genes (An et al. 2005, Ma et al. 2012, Shi et al. 2012, Ding et al. 2013). As anticipated, transient expression or silencing of *ZmCCaMK* in protoplasts resulted in a significant increase or decrease in the protein levels of *ZmCCaMK* (Fig. 4A). Transient expression of *ZmCCaMK* in protoplasts resulted in significant increases in expression of the antioxidant genes *APX2* and *SOD4* and corresponding activities of APX and SOD, when compared with control (Fig. 4B). Conversely, RNA interference (RNAi)-mediated silencing of *ZmCCaMK* decreased the expression of *APX2* and *SOD4* and the activities of APX and SOD (Fig. 4C). BR treatment could induce significant increases in expression of *APX2* and *SOD4* and activities of APX and SOD in control protoplasts (Control), but the response to BR treatment was strongly attenuated in *ZmCCaMK* transiently silenced protoplasts (RNAi) (Fig. 4C). These results indicate that *ZmCCaMK* is involved in BR-induced antioxidant defense in maize plants.

To confirm further that CCaMK functions in BR-induced antioxidant defense, the rice mutant line NF8513

(‘Nipponbare’) containing the *Tos17* insertion in *OsDMI3* (Os05g41090), the closest rice homolog of *ZmCCaMK*, was used. As is the case for *ZmCCaMK*, *OsDMI3* is a single-copy gene. BR treatment led to significant increases in activities of APX and SOD in leaves of wild-type rice, but could not up-regulate activities of APX and SOD in leaves of the NF8513 plants homozygous for the mutation (Fig. 5). These data further confirm that CCaMK is involved in BR-induced antioxidant defense.

### Ca<sup>2+</sup> is essential for BR-induced gene expression and activity of *ZmCCaMK*

As described above, both Ca<sup>2+</sup> and *ZmCCaMK* are involved in BR-induced antioxidant defense in maize leaves. To determine the relationship between Ca<sup>2+</sup> and *ZmCCaMK* in BR signaling, the effect of CaCl<sub>2</sub> on *ZmCCaMK* was determined first. Treatment with 20 mM CaCl<sub>2</sub> led to a significant increase in activity of *ZmCCaMK* (Fig. 6A). The activity of *ZmCCaMK* was up-regulated after 10 min, peaked at 30 min and then decreased after 45 min of CaCl<sub>2</sub> treatment.

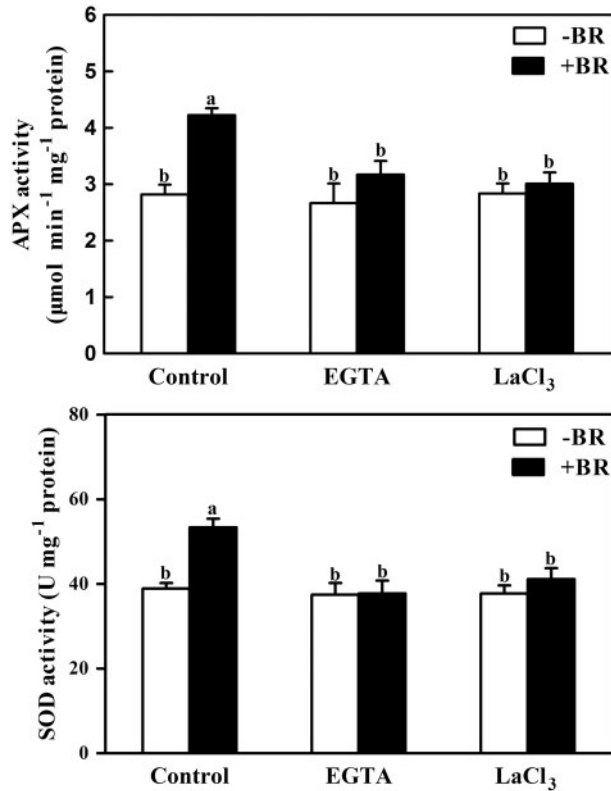

**Fig. 2** Effects of pre-treatments with a  $\text{Ca}^{2+}$  chelator and a  $\text{Ca}^{2+}$  channel blocker on the activities of antioxidant enzymes APX and SOD in leaves of maize exposed to BR treatment. The detached plants were treated with 5 mM EGTA or 5 mM  $\text{LaCl}_3$  for 4 h, then exposed to 10 nM BR for 12 h. Plants treated with distilled water under the same conditions served as controls. Values are means  $\pm$  SE of three different experiments. Means denoted by the same letter did not differ significantly at  $P < 0.05$  according to Duncan's multiple range test.

In order to investigate further whether BR-activated ZmCCaMK is related to BR-induced  $\text{Ca}^{2+}$ , the  $\text{Ca}^{2+}$  chelator EGTA and the  $\text{Ca}^{2+}$  channel blocker  $\text{LaCl}_3$  were used. Pre-treatments with EGTA and  $\text{LaCl}_3$  essentially eliminated BR-induced increases in gene expression and activity of ZmCCaMK, while these pre-treatments alone had no effect on gene expression and activity of ZmCCaMK (Fig. 6B, C). Together these results suggest that BR-induced  $\text{Ca}^{2+}$  is required for BR-up-regulated gene expression and activity of ZmCCaMK in maize leaves.

### ZmCCaMK affects BR-induced cytosolic $\text{Ca}^{2+}$ concentration elevation

Next, we wanted to explore if there is also a feedback regulation of ZmCCaMK on cytosolic  $\text{Ca}^{2+}$  concentration. To test this, the protoplasts transfected with ubi-ZmCCaMK-mCherry and double-stranded RNA (dsRNA) against ZmCCaMK were used. Transient expression of ZmCCaMK in protoplasts resulted in a significant increase in the concentration of cytosolic  $\text{Ca}^{2+}$ , which was further enhanced by BR treatment (Fig. 7A, B). Conversely, RNAi-mediated silencing of ZmCCaMK caused a significant decrease in the concentration of cytosolic  $\text{Ca}^{2+}$ ,

and BR treatment failed to induce the levels of cytosolic  $\text{Ca}^{2+}$  concentration observed in control protoplasts (Fig. 7C, D). These results indicate that ZmCCaMK mediates BR-induced elevation of cytosolic  $\text{Ca}^{2+}$  concentration.

### The relationship between $\text{H}_2\text{O}_2$ and ZmCCaMK in BR signaling

As described above, ZmCCaMK is involved in BR-induced antioxidant defense. Our previous study showed that BR induced the production of  $\text{H}_2\text{O}_2$ , which subsequently enhanced antioxidant defense (Zhang et al. 2010). Therefore, we wanted to determine whether BR-induced increases in gene expression and activity of ZmCCaMK are related to BR-induced endogenous  $\text{H}_2\text{O}_2$ . To test this, 3-(3,4-dichlorophenyl)-1,1-dimethylurea (DMTU) and CAT,  $\text{H}_2\text{O}_2$  scavengers, and diphenylene iodonium (DPI), an inhibitor of NADPH oxidase were used. Pre-treatments with DMTU, CAT and DPI substantially reduced the BR-induced increases in gene expression and activity of ZmCCaMK, while these pre-treatments alone had no effect (Fig. 8A), suggesting that  $\text{H}_2\text{O}_2$  is required for the BR-induced up-regulation in gene expression and activity of ZmCCaMK.

To investigate whether BR-activated ZmCCaMK also affects BR-induced  $\text{H}_2\text{O}_2$  production, the protoplasts transfected with ubi-ZmCCaMK-mCherry and dsRNA against ZmCCaMK were used. The results showed that transient expression of ZmCCaMK significantly increased  $\text{H}_2\text{O}_2$  accumulation (Fig. 8B), while transient silencing of ZmCCaMK significantly reduced  $\text{H}_2\text{O}_2$  accumulation (Fig. 8C). BR treatment could further enhance  $\text{H}_2\text{O}_2$  production in protoplasts transiently expressing ZmCCaMK (Fig. 8B) but only to a small degree in protoplasts where ZmCCaMK was transiently silenced (Fig. 8C). These results suggest that ZmCCaMK is also required for BR-induced  $\text{H}_2\text{O}_2$  production.

To obtain further evidence that CCaMK is required for BR-induced  $\text{H}_2\text{O}_2$  production, the mutant of *OsDMI3* was used and  $\text{H}_2\text{O}_2$  production was detected using 3,3'-diaminobenzidine (DAB) staining in rice leaves. As shown in Fig. 8D, BR treatment led to a substantial increase in the production of  $\text{H}_2\text{O}_2$  in wild-type leaves, but could only induce a small increase in  $\text{H}_2\text{O}_2$  in leaves of mutant line NF8513.

To determine further the mechanism of ZmCCaMK action in the regulation of  $\text{H}_2\text{O}_2$  production in BR signaling, we analyzed the gene expression of NADPH oxidase, which is an important source of apoplastic  $\text{H}_2\text{O}_2$  accumulation (Xia et al. 2009). As shown in Fig. 9A, the expression of *ZmrbohB*, *ZmrbohC* and *ZmrbohD* was substantially increased in protoplasts with transient expression of ZmCCaMK, and BR treatment could further enhance the expression of *ZmrbohB* and *ZmrbohC*. In contrast, RNAi-mediated silencing of ZmCCaMK decreased the expression of *ZmrbohB*, *ZmrbohC* and *ZmrbohD*, and the effect of BR treatment on expression was highly attenuated (Fig. 9B). These data indicate that not only does  $\text{H}_2\text{O}_2$  affect ZmCCaMK, but ZmCCaMK also regulates  $\text{H}_2\text{O}_2$  production via NADPH oxidase in BR signaling. Hence, as for  $\text{Ca}^{2+}$ , there is also a feedback loop between  $\text{H}_2\text{O}_2$  and ZmCCaMK in BR signaling.

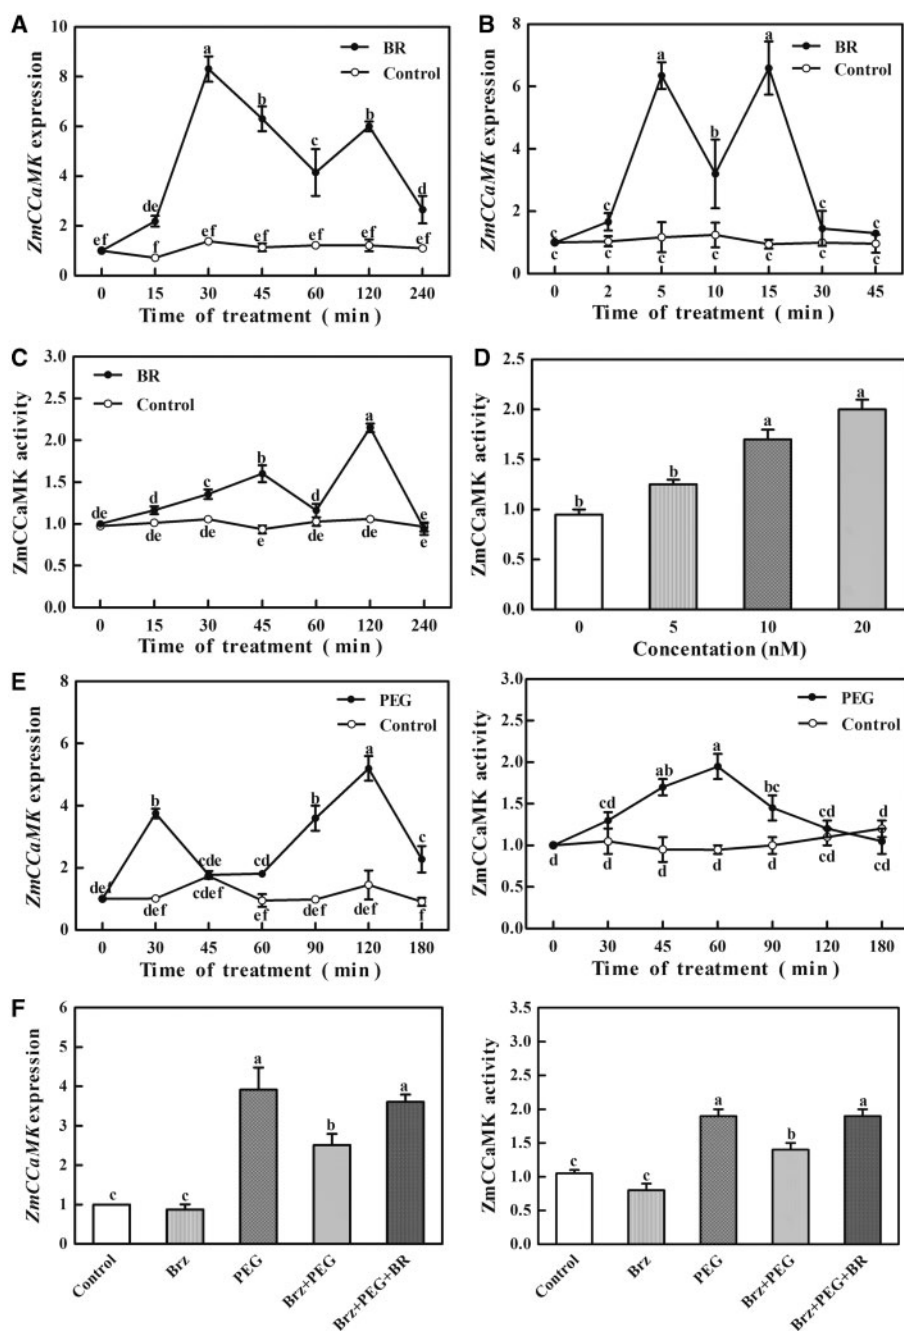

**Fig. 3** BR induces expression of *ZmCCaMK* and activity of *ZmCCaMK* in maize. (A, B) Expression of *ZmCCaMK* in maize leaves (A) or mesophyll protoplasts (B) exposed to BR treatment. The maize seedlings or protoplasts were treated with 10 nM BR for various times as indicated. Seedlings treated with distilled water and protoplasts treated with culture medium under the same conditions served as controls. The relative expression level of *ZmCCaMK* was analyzed by qRT-PCR. (C) Induction of activity of *ZmCCaMK* by BR. The detached plants were treated as described in (A). Protein extracted from control or BR-treated leaves was immunoprecipitated with *ZmCCaMK* antibody and then subjected to an in-gel kinase assay. (D) Dose dependence for BR-induced *ZmCCaMK* activation. The detached plants were treated with 0, 5, 10 or 20 nM BR for 45 min. Protein extracts were subjected to immunoprecipitation kinase assay. (E) Time course of PEG-induced gene expression of *ZmCCaMK* (left) and *ZmCCaMK* activity (right). The maize seedlings were treated with 10% PEG for various times as indicated. Seedlings treated with distilled water under the same conditions served as controls. (F) Effect of pre-treatment with the BR biosynthesis inhibitor brassinazole (Brz) on expression of *ZmCCaMK* (left) and activity of *ZmCCaMK* (right) in maize leaves exposed to PEG treatment. The detached plants were pre-treated with distilled water or 5  $\mu$ M Brz for 4 h, and then exposed to 10% PEG for 30 min (left) or 60 min (right). BR (10 nM) was added to overcome the effects of Brz. Values are means  $\pm$  SE of three different experiments. Means denoted by the same letter did not differ significantly at  $P < 0.05$  according to Duncan's multiple range test.

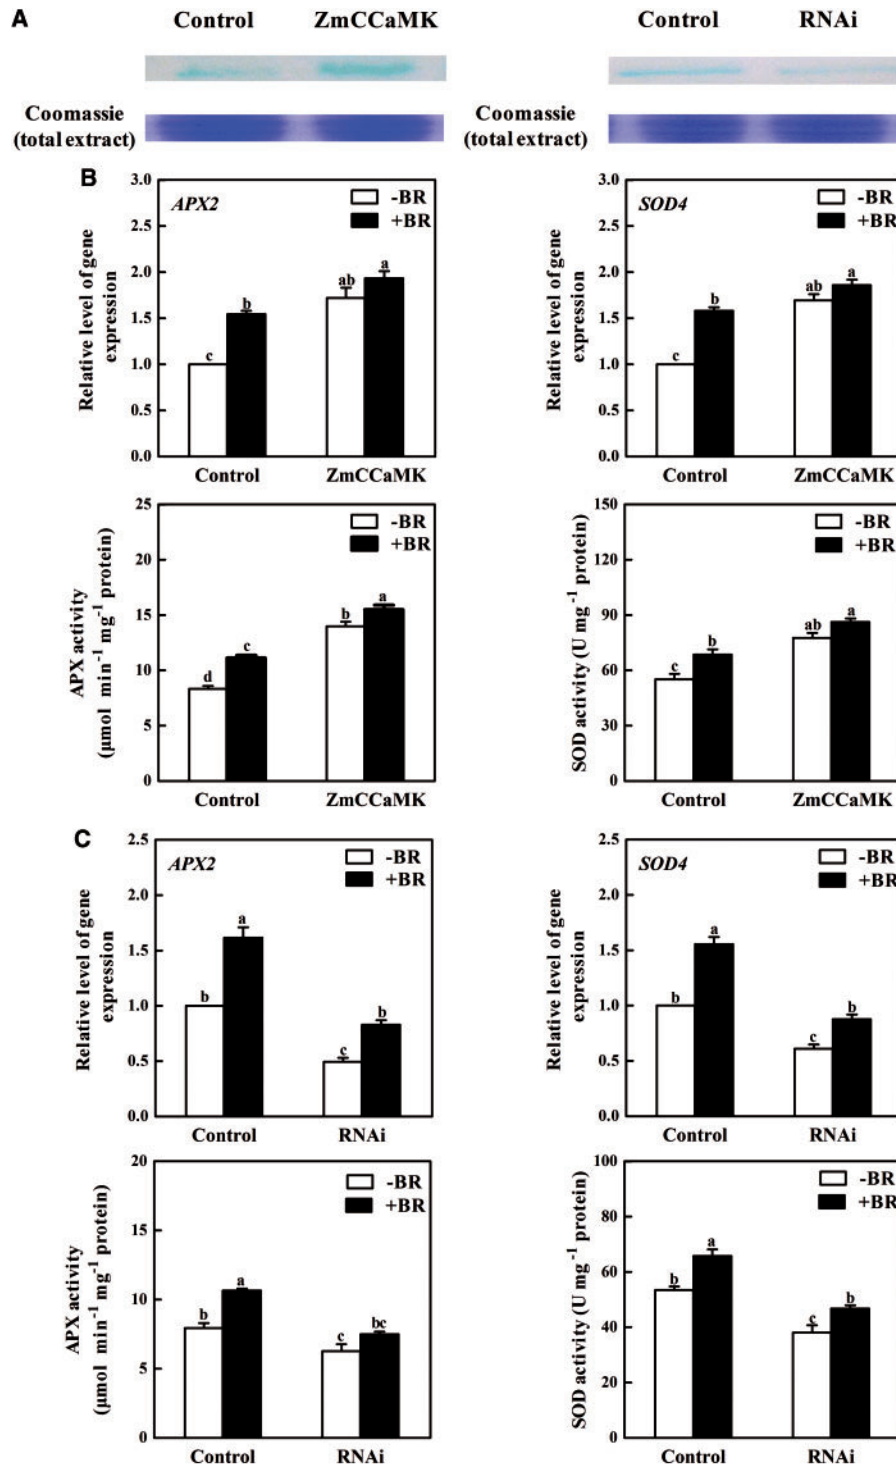

**Fig. 4** ZmCCaMK is involved in the BR-induced up-regulation in gene expression and activities of antioxidant enzymes APX and SOD in maize protoplasts. (A) The protein levels of ZmCCaMK in the protoplasts transiently expressing or silencing *ZmCCaMK*. (B) The expression of *APX2* and *SOD4* and activities of APX and SOD in the protoplasts transiently expressing *ZmCCaMK*. The protoplasts were transfected with constructs carrying *ubi-ZmCCaMK-YFP* (*ZmCCaMK*) or empty vector (Control) and incubated for 16 h. (C) The expression of *APX2* and *SOD4* and activities of APX and SOD in the protoplasts transiently silencing *ZmCCaMK*. The protoplasts were transfected with dsRNA against *ZmCCaMK* (RNAi) or distilled water (Control) and incubated for 24 h. The protoplasts (B, C) were treated with culture medium (–BR) or 10 nM BR (+BR) for 5 min (expression of *APX2* and *SOD4*) or 10 min (activities of APX and SOD). The protein levels of ZmCCaMK and the relative expression levels of *APX2* and *SOD4* and the activities of APX and SOD were measured as described in the Materials and Methods. In (A), experiments were repeated at least three times with similar results. In (B) and (C), values are means  $\pm$  SE of three different experiments. Means denoted by the same letter did not differ significantly at  $P < 0.05$  according to Duncan's multiple range test.

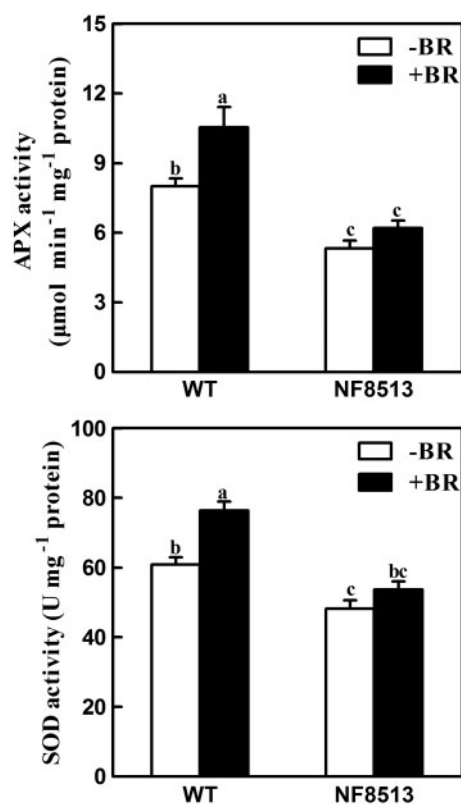

**Fig. 5** Total activities of APX and SOD in leaves of the rice mutant of *OsDMI3* and the wild type exposed to BR treatment. The plants were treated with 10 nM BR or distilled water for 12 h. Values are means  $\pm$  SE of three different experiments. Means denoted by the same letter did not differ significantly at  $P < 0.05$  according to Duncan's multiple range test.

## Discussion

Cytosolic  $\text{Ca}^{2+}$  functions as a ubiquitous second messenger in plants, and elevations in the concentration of cytosolic  $\text{Ca}^{2+}$  represent a central hub where multiple signal transduction pathways intersect (Monshausen 2012). There are only a few studies relating  $\text{Ca}^{2+}$  to BR signaling, e.g. it has been reported that  $\text{Ca}^{2+}$ -mediated signaling has a critical role in BR biosynthesis by controlling the function of DWF1 (Du and Poovaiah 2005) and both  $\text{Ca}^{2+}$  and BR increased the transcript level of *TalAA1* (Singla et al. 2006). Recently, Oh et al. (2012) found that CaM bound to the recombinant cytoplasmic domain of BRI1 in a  $\text{Ca}^{2+}$ -dependent manner. Further studies revealed that BR directly caused an elevation in cytosolic  $\text{Ca}^{2+}$  in *Arabidopsis*, indicating a role for  $\text{Ca}^{2+}$  in BR signaling (Zhao et al. 2013). Through analysis of the  $\text{Ca}^{2+}$  concentration in maize protoplasts exposed to BR treatment (Fig. 1), we found that BR induces elevation of the cytosolic  $\text{Ca}^{2+}$  concentration in an important crop plant. Our results further suggest that  $\text{Ca}^{2+}$  functions in the BR-induced antioxidant defense (Fig. 2). BR signal transduction is one of the best studied signaling pathways in plants (Jaillais et al. 2011). BRI1, a leucine-rich repeat receptor kinase, perceives BR at the cell surface, and then acts through autophosphorylation and transphosphorylation to transduce the BR response. However, some

recent studies point to a signaling cascade distinct from the phosphorylation/dephosphorylation cascade (Witthoft and Harter 2011, Harter et al. 2012, Zhao et al. 2013). Zhao et al. (2013) showed that BR induced  $\text{Ca}^{2+}$  and affected the expression of several genes independently of BR phosphorylation signaling downstream from the BRI1 receptor. They proposed that  $\text{Ca}^{2+}$  shuts down the BRI1-dependent phosphorylation cascade by regulating CaM or the cyclic nucleotide-gated channel. Apparently, BR-dependent  $\text{Ca}^{2+}$  signaling and the well-characterized phosphorylation/dephosphorylation system act independently to activate different BR-responsive genes. Therefore, the role of  $\text{Ca}^{2+}$  in BR-induced antioxidant defense might be independent of the phosphorelay cascade.

The key question in the field of  $\text{Ca}^{2+}$  signaling is by what means this simple ion can regulate such a wide spectrum of cellular processes. A cell must activate a unique combination of  $\text{Ca}^{2+}$  sensors to respond appropriately to a specific perturbation in cytosolic  $\text{Ca}^{2+}$  concentration induced by various stimuli. In animals, CaMKII, which has high homology to plant CCaMK (Yang et al. 2007), is an important decoder of  $\text{Ca}^{2+}$  signal (Smedler and Uhlén 2014). CaMKII and PP1 function together as a simple molecular device that specifically translates strong  $\text{Ca}^{2+}$  signals into all-or-none potentiation of individual hippocampal synapses (Bradshaw et al. 2003). In plants, CCaMK has been demonstrated to be involved in the root nodule and arbuscular mycorrhizal symbioses, meiosis and mitosis (Yang and Poovaiah 2003, Levy et al. 2004, Mitra et al. 2004, Gleason et al. 2006, Chen et al. 2007, Hayashi et al. 2010, Shimoda et al. 2012, Takeda et al. 2012). During the last few years, significant advances in determination of the role of the CCaMK in abiotic stress tolerance have also been reported. CCaMK was significantly influenced at the transcriptional and post-translational level by ABA, PEG, NaCl,  $\text{H}_2\text{O}_2$  and NO in maize, rice and wheat (Yang et al. 2011, Ma et al. 2012, Shi et al. 2012, Shi et al. 2014). Here we identified a  $\text{Ca}^{2+}$  decoder, ZmCCaMK, which responds to BR treatment at the transcriptional and post-translational levels in leaves of maize (Fig. 3). Moreover, our results also showed that ZmCCaMK functions in BR-induced antioxidant defense and requires BR-induced  $\text{Ca}^{2+}$  for the signal transduction (Fig. 4–6). The structure of CCaMK includes three EF-hand motifs that potentially bind  $\text{Ca}^{2+}$  ions, and it is therefore likely that  $\text{Ca}^{2+}$  binds directly to ZmCCaMK to regulate the activity of ZmCCaMK in BR signaling. However, BR-induced  $\text{Ca}^{2+}$  also affected the expression of ZmCCaMK (Fig. 6), so there is another pathway linking  $\text{Ca}^{2+}$  and the de novo synthesis of ZmCCaMK.

Our results further revealed that ZmCCaMK regulates the cytosolic  $\text{Ca}^{2+}$  concentration, forming a feedback loop in BR signaling (Fig. 7). The cytosolic concentration of  $\text{Ca}^{2+}$  is influenced by many factors.  $\text{Ca}^{2+}$  enters plant cells through  $\text{Ca}^{2+}$ -permeable ion channels in the plasma membrane (White 2000). Furthermore,  $\text{Ca}^{2+}$  released from intracellular compartments, such as the central vacuole and endoplasmic reticulum, also contributes to control cytosolic  $\text{Ca}^{2+}$  concentration in a variety of physiological responses (Berridge 2002, Pottosin and Schönknecht 2007). A recent study showed that BRI1

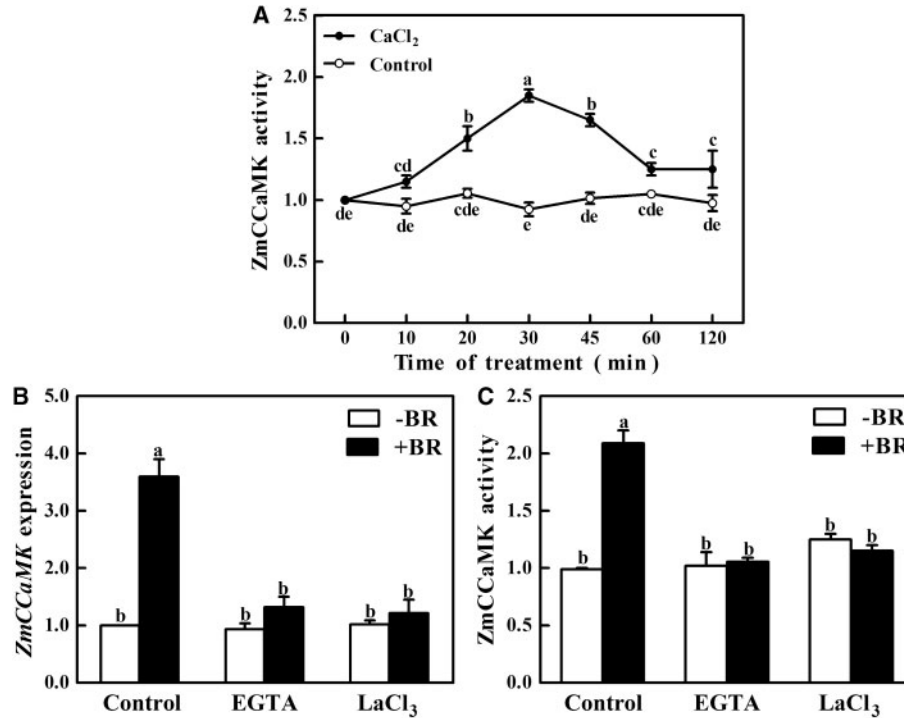

**Fig. 6** Ca<sup>2+</sup> is required for BR-induced gene expression and activation of ZmCCaMK in maize leaves. (A) CaCl<sub>2</sub>-induced changes in activity of ZmCCaMK in maize leaves. The detached plants were treated with 20 mM CaCl<sub>2</sub> for various times as indicated, and the activity of ZmCCaMK was analyzed by immunoprecipitation kinase assay. (B) Effects of pre-treatment with a Ca<sup>2+</sup> chelator and a Ca<sup>2+</sup> channel blocker on expression of ZmCCaMK in maize leaves exposed to BR treatment. The detached plants were pre-treated with 5 mM EGTA and 5 mM LaCl<sub>3</sub> for 4 h, and then exposed to 10 nM BR for 30 min. (C) Effects of pre-treatment with a Ca<sup>2+</sup> chelator and a Ca<sup>2+</sup> channel blocker on the activity of ZmCCaMK in maize leaves exposed to BR treatment. The detached plants were pre-treated with 5 mM EGTA and 5 mM LaCl<sub>3</sub> for 4 h, and then exposed to 10 nM BR for 45 min. Plants treated with distilled water under the same conditions served as controls. Values are means ± SE of three different experiments. Means denoted by the same letter did not differ significantly at *P* < 0.05 according to Duncan's multiple range test.

contributes to the BR-induced Ca<sup>2+</sup> signal (Zhao *et al.* 2013). However, there is no direct evidence to link CCaMK to regulation of the cytosolic Ca<sup>2+</sup> concentration in BR signaling so far, and the mechanism by which ZmCCaMK affects the cytosolic Ca<sup>2+</sup> concentration remains to be elucidated. Taken together, our results indicate that BR-induced cytosolic Ca<sup>2+</sup> concentration elevation activated ZmCCaMK, which then promoted further elevation in cytosolic Ca<sup>2+</sup> concentration to amplify BR signaling.

Although high concentrations of ROS are cytotoxic, lower concentrations of ROS have been considered as an important cellular signal (Miller *et al.* 2010, Mittler *et al.* 2011). Our recent study showed that H<sub>2</sub>O<sub>2</sub> treatment increased gene expression and activity of ZmCCaMK in maize leaves (Ma *et al.* 2012), and we show here that H<sub>2</sub>O<sub>2</sub> is required for the BR-induced up-regulation in gene expression and activity of ZmCCaMK (Fig. 8A), suggesting that H<sub>2</sub>O<sub>2</sub> regulates ZmCCaMK in BR signaling. However, previous studies also showed that *OsDMI3*, the rice ortholog of ZmCCaMK, is involved in the regulation of H<sub>2</sub>O<sub>2</sub> synthesis in ABA signaling (Shi *et al.* 2012). Here, our results clearly indicate that ZmCCaMK also affects H<sub>2</sub>O<sub>2</sub> accumulation in BR signaling (Fig. 8B–D). BR-induced apoplastic H<sub>2</sub>O<sub>2</sub> originated mainly from NADPH oxidase, and H<sub>2</sub>O<sub>2</sub> can amplify itself by regulating NADPH oxidase (Zhang *et al.* 2010). In the present study, ZmCCaMK affected the expression of BR-induced

NADPH oxidase genes (Fig. 9). These data suggest that H<sub>2</sub>O<sub>2</sub> induced by BR activated ZmCCaMK, and then ZmCCaMK further stimulated the production of H<sub>2</sub>O<sub>2</sub> by up-regulating NADPH oxidase gene expression, forming a positive amplification loop.

In conclusion, the central tenet of the work presented is the novel finding that Ca<sup>2+</sup> works together with ZmCCaMK in BR-induced antioxidant defense. There is a close link between Ca<sup>2+</sup> and ZmCCaMK and a feedback loop between ZmCCaMK and H<sub>2</sub>O<sub>2</sub> in BR signaling in plants. BR induces H<sub>2</sub>O<sub>2</sub> production and elevated Ca<sup>2+</sup>, which up-regulate gene expression and activity of ZmCCaMK that in turn results in further Ca<sup>2+</sup> accumulation and enhances the H<sub>2</sub>O<sub>2</sub> production via NADPH oxidase. Ultimately the signal transduction induces antioxidant defense systems to scavenge excess H<sub>2</sub>O<sub>2</sub> (Fig. 10).

## Materials and Methods

### Plant materials and treatments

Maize (*Zea mays* L. cv. Nongda 108; from Nanjing Agricultural University, China), rice (*Oryza sativa*) cultivar Nipponbare and the rice mutant line NF8513 were used in this study. In the mutant experiments, Nipponbare was used as the wild-type control. Seeds of maize were sown in trays of sand, and rice plants were grown hydroponically with a nutrient solution in a growth



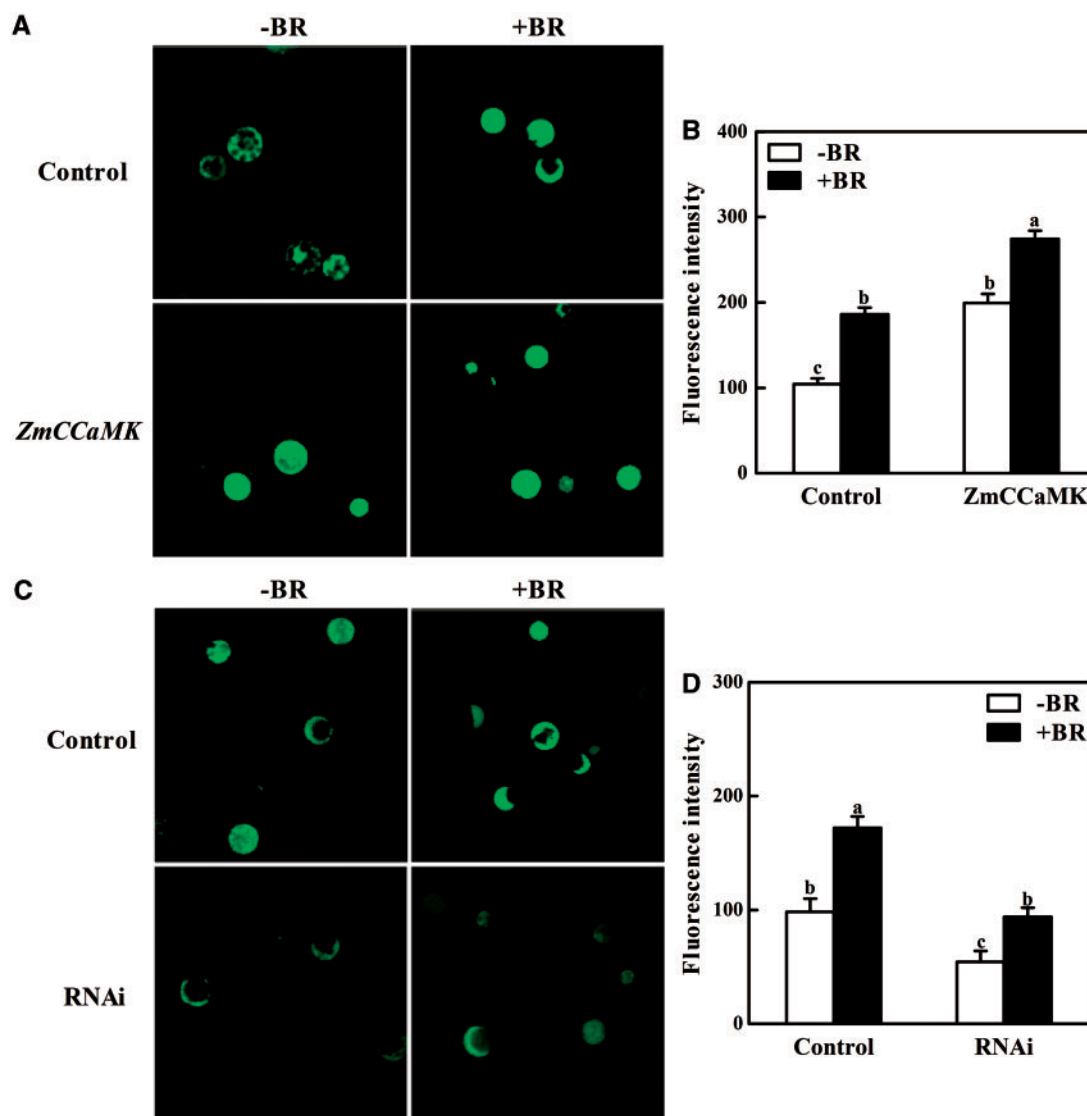

**Fig. 7** ZmCCaMK mediates the BR-induced cytosolic  $\text{Ca}^{2+}$  concentration in maize protoplasts. (A)  $\text{Ca}^{2+}$  fluorescence in protoplasts transiently expressing ZmCCaMK. The protoplasts were transfected with constructs carrying ubi-ZmCCaMK-mCherry (ZmCCaMK) or empty vector (Control), then loaded with Fluo-3/AM, treated with culture medium (-BR) or 10 nM BR (+BR), and observed by laser scanning confocal microscopy (LSCM). (B) Quantitation of the fluorescence intensity in (A). (C)  $\text{Ca}^{2+}$  fluorescence in the protoplasts transiently silencing ZmCCaMK. The protoplasts were transfected with dsRNA against ZmCCaMK (RNAi) or distilled water (Control), then loaded with Fluo-3/AM, and treated with culture medium (-BR) or 10 nM BR (+BR), and observed by LSCM. (D) Quantitation of the fluorescence intensity in (C). The fluorescence intensity (B, D) was measured by fluorescence microscopy and calculated as the average value of those obtained by scanning > 50 protoplasts from three different experiments. In (A) and (C), experiments were repeated at least three times with similar results. In (B) and (D), values are means  $\pm$  SE of three different experiments. Means denoted by the same letter did not differ significantly at  $P < 0.05$  according to Duncan's multiple range test.

chamber at a temperature of 22–28°C, photosynthetic active radiation of  $200 \mu\text{mol m}^{-2} \text{s}^{-1}$  and a photoperiod of 14/10 h (day/night), and were watered daily. For protoplast isolation, maize plants were grown at 26°C under dark conditions. When the second leaves were fully expanded, they were collected and used for investigations.

The plants were excised at the base of the stems and placed in distilled water for 2 h to eliminate wound stress. After treatment, the cut ends of the stems were placed in beakers wrapped with aluminum foil containing 10 nM BR, 20 mM  $\text{CaCl}_2$  or 10% (w/v) PEG6000 solution for various times at 25°C, with a continuous light intensity of  $200 \mu\text{mol m}^{-2} \text{s}^{-1}$ . In order to study the effects of various inhibitors or scavengers, the detached plants were pre-treated with 5 mM EGTA, 5 mM  $\text{LaCl}_3$ , 100  $\mu\text{M}$  DPI, 200 U of CAT, 10 mM DMTU or 5  $\mu\text{M}$  Brz for 4 h, and then subjected to 10 nM BR or 10% PEG treatment for various

times under the same conditions as described above. Detached plants were treated with distilled water under the same conditions for the whole period to serve as controls for the above. After treatments of detached plants, the second leaves were sampled and immediately frozen under liquid  $\text{N}_2$  for further analysis.

### Isolation of total RNA and real-time quantitative reverse transcription-PCR (qRT-PCR) expression analysis

Total RNA was isolated from leaves or protoplasts using an RNAiso Plus kit (TAKARA) according to the instructions supplied by the manufacturer. DNase treatment was included in isolation step using RNase-free DNase (TAKARA).

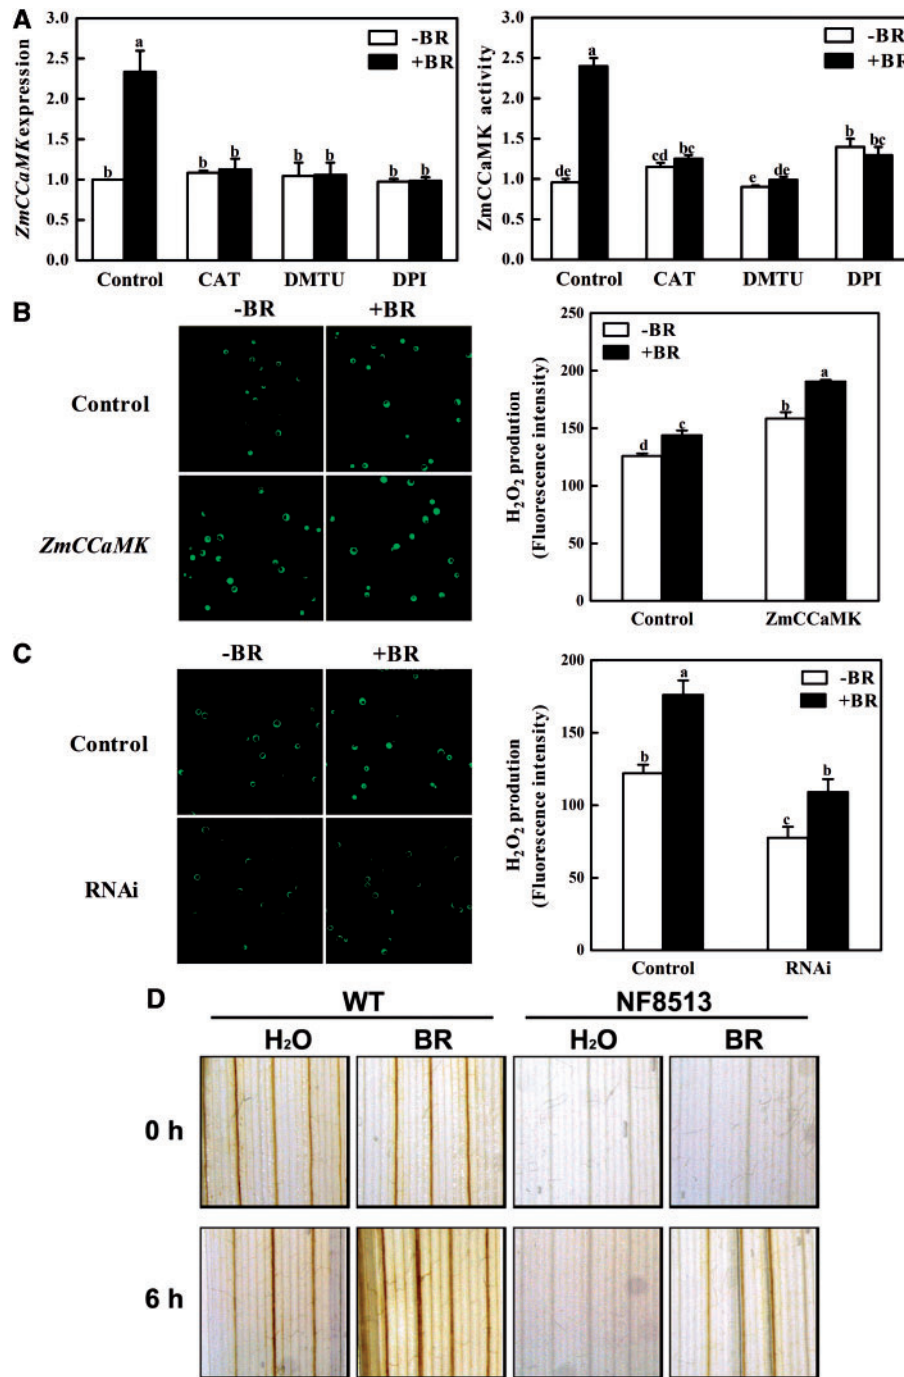

**Fig. 8** Relationship between ZmCCaMK and H<sub>2</sub>O<sub>2</sub> in BR signaling. (A) Effects of pre-treatment with the H<sub>2</sub>O<sub>2</sub> scavenger or inhibitor CAT, DMTU and DPI on expression of *ZmCCaMK* (left) and activity of ZmCCaMK (right) in maize leaves exposed to BR treatment. The detached plants were pre-treated with 200 U of CAT, 10 mM DMTU or 100 μM DPI for 4 h, and then exposed to 10 nM BR for 30 min (left) or 45 min (right). Plants treated with distilled water under the same conditions served as controls. (B) H<sub>2</sub>O<sub>2</sub> fluorescence (left) and quantitation of the fluorescence intensity (right) in the protoplasts transiently expressing *ZmCCaMK*. The protoplasts transfected with constructs carrying ubi-*ZmCCaMK*-mCherry (*ZmCCaMK*) or empty vector (Control) were treated with 10 nM BR (+BR) or incubation medium (-BR) for 10 min and then loaded with H<sub>2</sub>DCF-DA for 10 min. H<sub>2</sub>O<sub>2</sub> was visualized by confocal microscopy. (C) H<sub>2</sub>O<sub>2</sub> fluorescence (left) and quantitation of the fluorescence intensity (right) in the protoplasts transiently silencing *ZmCCaMK*. The protoplasts transfected with dsRNA against *ZmCCaMK* (RNAi) or distilled water (Control) were treated with 10 nM BR (+BR) or incubation medium (-BR) for 10 min and then loaded with H<sub>2</sub>DCF-DA for 10 min. H<sub>2</sub>O<sub>2</sub> was visualized by confocal microscopy. (D) Histochemical detection of leaf H<sub>2</sub>O<sub>2</sub> production in the rice mutant of *OsDMI3* and the wild type exposed to BR treatment. The plants were excised at the base of the stem and the detached plants were treated with 10 nM BR or distilled water for 6 h; H<sub>2</sub>O<sub>2</sub> production in leaves was detected by DAB staining. In (B–D), experiments were repeated at least three times with similar results. In (A), values are means ± SE of three different experiments. Means denoted by the same letter did not differ significantly at *P* < 0.05 according to Duncan's multiple range test.

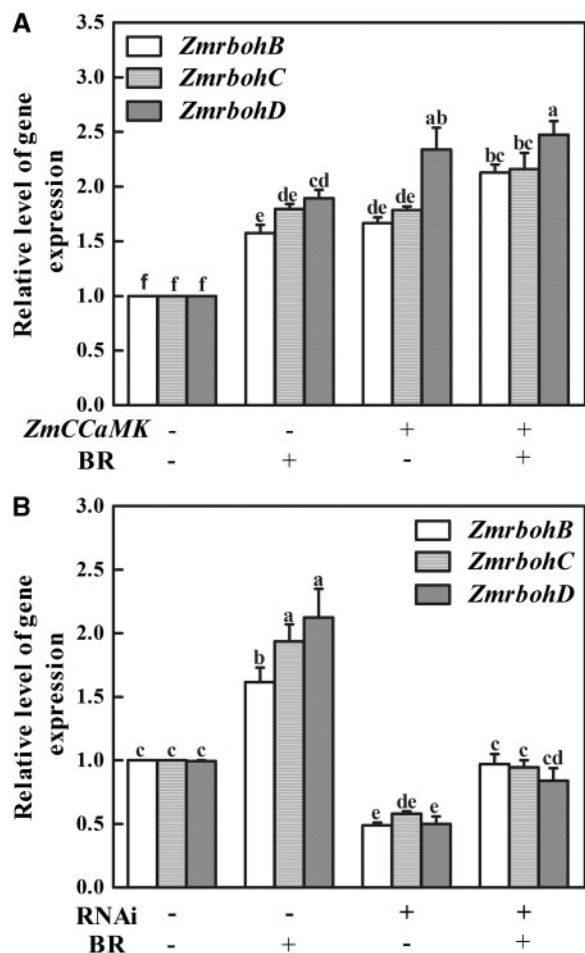

**Fig. 9** ZmCCaMK affects the expression of NADPH oxidase genes in maize protoplasts. (A) Expression analysis of *ZmrbobB*–*ZmrbobD* in the protoplasts transiently expressing *ZmCCaMK*. The protoplasts were transfected with constructs carrying ubi-*ZmCCaMK*-YFP (*ZmCCaMK*+) or empty vector (*ZmCCaMK*-). (B) Expression analysis of *ZmrbobB*–*ZmrbobD* in the protoplasts transiently silencing *ZmCCaMK*. The protoplasts were transfected with dsRNA against *ZmCCaMK* (RNAi+) or distilled water (RNAi-). The protoplasts (A, B) were treated with culture medium (BR-) or 10 nM BR (BR+) for 10 min, and the relative expression level of *ZmrbobB*-*D* was analyzed by qRT-PCR. Values are means  $\pm$  SE of three different experiments. Means denoted by the same letter did not differ significantly at  $P < 0.05$  according to Duncan's multiple range test.

Approximately 2  $\mu$ g of total RNA was reverse transcribed using an oligo(dT)<sub>16</sub> primer and Moloney murine leukemia virus reverse transcriptase (TAKARA). Transcript levels of several genes were measured by qRT-PCR using a DNA Engine Opticon 2 real-time PCR detection system (Bio-Rad) with SYBR<sup>®</sup> Premix Ex Taq<sup>™</sup> (TAKARA) according to the manufacturer's instructions. The cDNA was amplified by PCR using the following primers: *ZmCCaMK* (GenBank accession No. DQ403196), forward CTCAAGCCCCGAACTGCC and reverse TGGCAGCCGAGACATCC; *SOD4* (GenBank accession No. X17565), forward TGAGCACCAGAAGATGA and reverse CTCGTGTCCACCTTTCC; *APX2* (GenBank accession No. EU969033), forward TGAGCGACCAGGACATTG and reverse GAGGGCTTTGTCACTTGGT; *ZmrbobB* (GenBank accession No. EU807966), forward GGCCAGTACTTCGGTGAAACA and reverse ATTACACAGTGATGCCTTCCA; *ZmrbobC* (GenBank accession No. DQ897930), forward TTCTCTTGCTGTATGCCG and reverse CTTCGTATTCCGACCCA; *ZmrbobD* (GenBank accession No. EF364442), forward CCGGTCCAGACCGTCTCT and reverse CCTGATCCGTGATCTTCGAAA; and *ZmACTIN* (GenBank

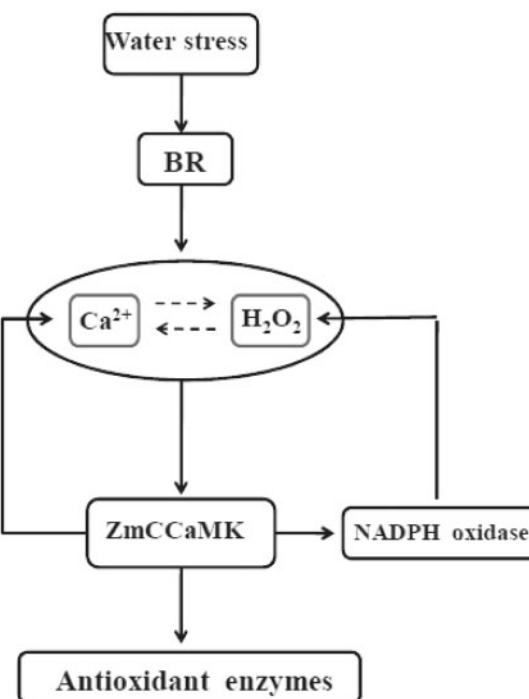

**Fig. 10** Model of the relationship of  $H_2O_2$ ,  $Ca^{2+}$  and ZmCCaMK in BR-induced antioxidant defense. BR induces  $H_2O_2$  production and  $Ca^{2+}$  accumulation, which cause an increase in both transcription and activity of ZmCCaMK, leading to up-regulation of antioxidant defense enzymes. Meanwhile, ZmCCaMK affects  $Ca^{2+}$  accumulation and also enhances the  $H_2O_2$  via NADPH oxidase, forming two positive feedback loops.

accession No. J01238), forward GTTTCCTGGGATTGCCGAT and reverse TCTGCTGCTGAAAAGTGCTGAG. To standardize the results, the amplification of *ZmACTIN* was determined and used as the internal standard. The data were normalized to the amplification of a maize *ZmACTIN* gene.

### Antibody production and immunoprecipitation kinase activity assay

A peptide for ZmCCaMK-C (GDITEPGKLEVFVD) corresponding to the C-terminus of ZmCCaMK was synthesized and conjugated to keyhole limpet hemocyanin. The ZmCCaMK polyclonal antibody was raised in rabbits and purified by affinity chromatography. Protein was extracted from maize leaves as described previously (Ma et al. 2012). Protein content was determined according to the method of Bradford (1976) with bovine serum albumin (BSA) as standard. For immunocomplex kinase assay, protein extract (100  $\mu$ g) was incubated with anti-ZmCCaMK antibody (7.5  $\mu$ g) in an immunoprecipitation buffer as described previously (Ma et al. 2012). Kinase activity in the immunocomplex was incubated in reaction buffer [25 mM Tris, pH 7.5, 5 mM  $MgCl_2$ , 1 mM dithiothreitol (DTT), 2.5 mM  $CaCl_2$ , 2  $\mu$ M CaM, 1 mg  $ml^{-1}$  myelin basic protein (MBP) with 200 nM ATP plus 1  $\mu$ Ci of  $[\gamma\text{-}^{32}P]$ ATP (3,000 Ci  $mM^{-1}$ ) for 30 min. An equal volume of SDS sample buffer was added to stop the reaction. The reaction mix was boiled at 100°C for 5 min and resolved by SDS-PAGE. The unincorporated  $[\gamma\text{-}^{32}P]$ ATP was removed by washing with 5% trichloroacetic acid (w/v)/1% sodium pyrophosphate (w/v) at least three times. The gel was dried onto Whatman 3 MM paper and exposed to Kodak XAR-5 film. Relative activation levels of ZmCCaMK protein were quantitated by Quantity One software (Bio-Rad Laboratories Inc.).

### Western blot assay

Proteins were extracted from protoplasts transfected with ubi-*ZmCCaMK*-YFP (yellow fluorescent protein; empty vector as control) or dsRNAs ( $H_2O$  as

control), and 20 µg of total protein was subjected to SDS-PAGE. Western blot analysis was performed as described by Sambrook and Russell (2001). Anti-ZmCCaMK antibody was used to detect the ZmCCaMK protein.

### Antioxidant enzyme assay

The detached plants and protoplasts were homogenized in 0.6 ml of 50 mM potassium phosphate buffer (pH 7.0) containing 1 mM EDTA and 1% polyvinylpyrrolidone, with the addition of 1 mM ascorbate in the case of the APX assay. The homogenate was centrifuged at 12,000 × g for 30 min at 4°C and the supernatant was immediately used for the subsequent antioxidant enzyme assays. The total activities of antioxidant enzymes were determined as previously described (Zhu et al. 2013). Total SOD activity was assayed by monitoring the inhibition of photochemical reduction of nitroblue tetrazolium. One unit of SOD activity was defined as the amount of enzyme that was required to cause 50% inhibition of the reduction of nitroblue tetrazolium, as monitored at 560 nm. Total APX activity was measured by monitoring the decrease in absorbance at 290 nm as ascorbate was oxidized.

### Histochemical detection of H<sub>2</sub>O<sub>2</sub>

H<sub>2</sub>O<sub>2</sub> was visually detected in the leaves of plants by using DAB as substrate (Orozco-Cardenas and Ryan 1999).

### H<sub>2</sub>O<sub>2</sub> detection by confocal laser scanning microscopy

H<sub>2</sub>O<sub>2</sub> production in protoplasts was monitored using the H<sub>2</sub>O<sub>2</sub>-sensitive fluorescent probe 2,7-dichlorofluorescein diacetate (H<sub>2</sub>DCF-DA; Molecular Probes) using the method described by Bright et al. (2006). Images acquired were analyzed using Leica IMAGE software. Data are presented as mean pixel intensities.

### Measurement of cytosolic calcium concentration ([Ca<sup>2+</sup>]<sub>i</sub>)

For measurement of [Ca<sup>2+</sup>]<sub>i</sub>, the maize mesophyll protoplasts were loaded with the Ca<sup>2+</sup>-sensitive fluorescent dye Fluo-3/AM ester (Molecular Probes) and observed by LSCM according to the method described by Zhang et al. (1998). Fluo-3/AM was added from a stock solution of 1 mM Fluo-3/AM in dimethylsulfoxide. After incubation at 4°C for 1 h in the dark, the protoplasts were washed twice with an isotonic solution and incubated at 25°C for 1 h in the dark. The incubation solution contained 20 µM Fluo-3/AM ester, 0.5 M mannitol, 4 mM MES (pH 5.7) and 20 mM KCl. Fluorescent probes were excited with a 488 nm laser, and emission fluorescence was filtered by a 515 nm filter to eliminate the autofluorescence of Chl. Pictures were taken by scanning three times each for 30 s, and then the fluorescence intensities of these pictures were measured by fluorescence microscopy after establishing a stable baseline.

### In vitro synthesis of dsRNA

DNA templates were produced by PCR using primers containing the T7 promoter sequence (5'-TTAATCGACTCACTATAGGGAGG-3') on both the 5' and 3' ends. The primers used to amplify DNA of ZmCCaMK were: forward CAAGCCCGAGAACTGCC and reverse TGGCAGCCGAGACATCC. The PCR amplification consisted of initial denaturation at 94°C for 3 min, and then 35 cycles of 94°C for 20 s, 60°C for 15 s and 72°C for 20 s, and a final extension at 72°C for 2 min. dsRNA of ZmCCaMK was synthesized in vitro using the RiboMAX™ Large Scale RNA Production System-T7 (Promega) according to the manufacturer's instructions. The purity and concentration of synthesized dsRNA were checked by 2% agarose gel electrophoresis and spectrophotometry.

### Protoplast preparation and transfection with constructs or dsRNAs

Protoplast isolation and transfection with constructs or dsRNAs were based on the protocol for maize mesophyll protoplasts provided online by J. Sheen's laboratory (<http://genetics.mgh.harvard.edu/sheenweb>) with minor modifications.

For transfection, 1 ml of maize protoplasts (usually 5 × 10<sup>5</sup> cells ml<sup>-1</sup>) were transfected with 150 µg of ubi-ZmCCaMK-YFP or ubi-ZmCCaMK-mCherry fusion constructs (empty vector as control) or 100 µg of dsRNAs (H<sub>2</sub>O as control) using a PEG-calcium-mediated method. The transfected protoplasts were then incubated in incubation solution overnight in the dark at 25°C. After that, protoplasts were collected and used for further analysis.

### Funding

This work was supported by the National Natural Science Foundation of China [Nos. 31371547 and 31071344 to A.Z., and Nos. 31271631 and 31070254 to M.J.]; the Program for New Century Excellent Talents in University [NCET-10-0498 to A.Z.]; the Fundamental Research Funds for the Central Universities [No. KYZ201157 to A.Z., and No. KYZ200905 and KYT201001 to M.J.]; the National Basic Research Program of China [grant No. 2012CB114300 to M.J.]; the Project Funded by the Priority Academic Program Development of Jiangsu Higher Education Institutions.

### Acknowledgments

The authors thank Professor Henrik Vibe Scheller for English polishing.

### Disclosures

The authors have no conflicts of interest to declare.

### References

- Ahamed, G.J., Ruan, Y.P., Zhou, J., Xia, X.J., Shi, K., Zhou, Y.H. et al. (2013) Brassinosteroid alleviates polychlorinated biphenyls-induced oxidative stress by enhancing antioxidant enzymes activity in tomato. *Chemosphere* 90: 2645–2653.
- An, C.L., Sawada, A., Kawaguchi, Y., Fukusaki, E. and Kobayashi, A. (2005) Transient RNAi induction against endogenous genes in *Arabidopsis* protoplasts using in vitro-prepared double-stranded RNA. *Biosci. Biotechnol. Biochem.* 69: 415–418.
- Asami, T., Mizutani, M., Fujioka, S., Goda, H., Min, Y.K., Shimada, Y. et al. (2001) Selective interaction of triazole derivatives with DWF4, a cytochrome P450 monooxygenase of the brassinosteroid biosynthetic pathway, correlates with brassinosteroid deficiency in planta. *J. Biol. Chem.* 276: 25687–25691.
- Bajguz, A. (2007) Metabolism of brassinosteroids in plants. *Plant Physiol. Biochem.* 45: 95–107.
- Batistič, O. and Kudla, J. (2012) Analysis of calcium signaling pathways in plants. *Biochim. Biophys. Acta* 1820: 1283–93.
- Berridge, M.J. (2002) The endoplasmic reticulum: a multifunctional signaling organelle. *Cell Calcium* 32: 235–249.
- Bradford, M.M. (1976) A rapid and sensitive method for the quantitation of microgram quantities of protein utilizing the principle of protein-dye binding. *Anal. Biochem.* 72: 248–254.
- Bradshaw, J.M., Kubota, Y., Meyer, T. and Schulman, H. (2003) An ultra-sensitive Ca<sup>2+</sup>/calmodulin-dependent protein kinase II-protein phosphatase 1 switch facilitates specificity in postsynaptic calcium signaling. *Proc. Natl Acad. Sci. USA* 100: 10512–10517.

- Bright, J., Desikan, R., Hancock, J.T., Weir, I.S. and Neill, S.J. (2006) ABA-induced NO generation and stomatal closure in Arabidopsis are dependent on H<sub>2</sub>O<sub>2</sub> synthesis. *Plant J.* 45: 113–122.
- Capoen, W., Herder, J.D., Sun, J., Verplancke, C., Keyser, A.D., Rycke, R.D. et al. (2009) Calcium spiking patterns and the role of the calcium/calmodulin-dependent kinase CCaMK in lateral root base nodulation of *Sesbania rostrata*. *Plant Cell* 21: 1526–1540.
- Chen, C., Gao, M., Liu, J. and Zhu, H. (2007) Fungal symbiosis in rice requires an ortholog of a legume common symbiosis gene encoding a Ca<sup>2+</sup>/calmodulin-dependent protein kinase. *Plant Physiol.* 145: 1619–1628.
- Chen, J.G., Pandey, S., Huang, J., Alonso, J.M., Ecker, J.R., Assmann, S.M. et al. (2004) GCR1 can act independently of heterotrimeric G-protein in response to brassinosteroids and gibberellins in Arabidopsis seed germination. *Plant Physiol.* 135: 907–915.
- Choudhary, S.P., Bhardwaj, R., Gupta, B.D., Dutt, P., Gupta, R.K., Biondi, S. et al. (2010) Epibrassinolide induces changes in indole-3-acetic acid, abscisic acid and polyamine concentrations and enhances antioxidant potential of radish seedlings under copper stress. *Physiol. Plant.* 140: 280–296.
- Choudhary, S.P., Yu, J.Q., Yamaguchi-Shinozaki, K., Shinozaki, K. and Tran, L.S. (2012) Benefits of brassinosteroid crosstalk. *Trends Plant Sci.* 10: 594–605.
- DeFalco, T.A., Bender, K.W. and Snedden, W.A. (2010) Breaking the code: Ca<sup>2+</sup> sensors in plant signaling. *Biochem J.* 425: 27–40.
- Ding, Y.F., Cao, J.M., Ni, L., Zhu, Y., Zhang, A.Y., Tan, M.P. et al. (2013) ZmCPK11 is involved in abscisic acid-induced antioxidant defense and functions upstream of ZmMPK5 in the abscisic acid signaling in maize. *J. Exp. Bot.* 64: 871–884.
- Dodd, A.N., Kudla, J. and Sanders, D. (2010) The language of calcium signaling. *Annu. Rev. Plant Biol.* 61: 593–620.
- Du, L. and Poovaiah, B.W. (2005) Ca<sup>2+</sup>/calmodulin is critical for brassinosteroid biosynthesis and plant growth. *Nature* 437: 741–745.
- Fàbregas, N., Li, N., Boeren, S., Nash, T.E., Goshe, M.B., Clouse, S.D. et al. (2013) The brassinosteroid insensitive1-like3 signalosome complex regulates Arabidopsis root development. *Plant Cell* 25: 3377–3388.
- Finkelstein, R., Reeves, W., Ariizumi, T. and Steber, C. (2008) Molecular aspects of seed dormancy. *Annu. Rev. Plant Biol.* 59: 387–415.
- Gao, Y., Wang, S., Asami, T. and Chen, J.G. (2008) Loss-of-function mutations in the Arabidopsis heterotrimeric G-protein  $\alpha$  subunit enhance the developmental defects of brassinosteroid signaling and biosynthesis mutants. *Plant Cell Physiol.* 49: 1013–1024.
- Gleason, C., Chaudhuri, S., Yang, T., Muñoz, A., Poovaiah, B.W. and Oldroyd, G.E. (2006) Nodulation independent of rhizobia induced by a calcium-activated kinase lacking autoinhibition. *Nature* 441: 1149–1152.
- Harper, J.F., Breton, G. and Harmon, A. (2004) Decoding Ca<sup>2+</sup> signals through plant protein kinases. *Annu. Rev. Plant Biol.* 55: 263–288.
- Harper, J.F. and Harmon, A. (2005) Plants, symbiosis and parasites: a calcium signaling connection. *Nat. Rev. Mol. Cell Biol.* 6: 555–566.
- Harter, K., Meixner, A.J. and Schleifenbaum, F. (2012) Spectro-microscopy of living plant cells. *Mol. Plant* 5: 14–26.
- Hashimoto, K. and Kudla, J. (2011) Calcium decoding mechanisms in plants. *Biochimie* 93: 2054–2059.
- Hayashi, T., Banba, M., Shimoda, Y., Kouchi, H., Hayashi, M. and Imaizumi-Anraku, H. (2010) A dominant function of CCaMK in intracellular accommodation of bacterial and fungal endosymbionts. *Plant J.* 63: 141–154.
- Hayat, S., Khalique, G., Wani, A.S., Alyemeni, M.N. and Ahmad, A. (2014) Protection of growth in response to 28-homobrassinolide under the stress of cadmium and salinity in wheat. *Int. J. Biol. Macromol.* 64: 130–136.
- Jaillais, Y., Hothorn, M., Belkhadir, Y., Dabi, T., Nimchuk, Z.L., Meyerowitz, E.M. et al. (2011) Tyrosine phosphorylation controls brassinosteroid receptor activation by triggering membrane release of its kinase inhibitor. *Genes Dev.* 25: 232–237.
- Kagale, S., Divi, U.K., Krochko, J.E., Keller, W.A. and Krishna, P. (2007) Brassinosteroid confers tolerance in *Arabidopsis thaliana* and *Brassica napus* to a range of abiotic stresses. *Planta* 225: 353–364.
- Kim, T.W. and Wang, Z.Y. (2010) Brassinosteroid signal transduction from receptor kinases to transcription factors. *Annu. Rev. Plant Biol.* 61: 681–704.
- Kudla, J., Batistič, O. and Hashimoto, K. (2010) Calcium signals: the lead currency of plant information processing. *Plant Cell* 22: 541–563.
- Levy, J., Bres, C., Geurts, R., Chalhoub, B., Kulikova, O., Duc, G. et al. (2004) A putative Ca<sup>2+</sup> and calmodulin-dependent protein kinase required for bacterial and fungal symbioses. *Science* 303: 1361–1364.
- Li, J. and Chory, J. (1999) Brassinosteroid actions in plants. *J. Exp. Bot.* 50: 275–282.
- Luan, S., Kudla, J., Rodriguez-Concepcion, M., Yalovsky, S. and Grissem, W. (2002) Calmodulins and calcineurin B-like proteins: calcium sensors for specific signal response coupling in plants. *Plant Cell* 14: S389–S400.
- Ma, F.F., Lu, R., Liu, H.Y., Shi, B., Zhang, J.H., Tan, M.P. et al. (2012) Nitric oxide-activated calcium/calmodulin-dependent protein kinase regulates the abscisic acid-induced antioxidant defense in maize. *J. Exp. Bot.* 63: 4835–4847.
- McAinsh, M.R. and Pittman, J.K. (2009) Shaping the calcium signature. *New Phytol.* 181: 275–294.
- Miller, G., Suzuki, N., Ciftci-Yilmaz, S. and Mittler, R. (2010) Reactive oxygen species homeostasis and signaling drought and salinity stresses. *Plant Cell Environ.* 33: 453–467.
- Mitra, R.M., Gleason, C.A., Edwards, A., Hadfield, J., Downie, J.A., Oldroyd, G.E. et al. (2004) A Ca<sup>2+</sup>/calmodulin-dependent protein kinase required for symbiotic nodule development: gene identification by transcript-based cloning. *Proc. Natl Acad. Sci. USA* 101: 4701–4705.
- Mittler, R., Vanderauwera, S., Suzuki, N., Miller, G., Tognetti, V.B., Vandepoele, K. et al. (2011) ROS signaling: the new wave? *Trends Plant Sci.* 16: 300–309.
- Monshausen, G.B. (2012) Visualizing Ca<sup>2+</sup> signatures in plants. *Curr. Opin. Plant Biol.* 15: 677–682.
- Nemhauser, J.L., Hong, F. and Chory, J. (2006) Different plant hormones regulate similar processes through largely nonoverlapping transcriptional responses. *Cell* 126: 467–475.
- Oh, M.H., Kim, H.S., Wu, X., Clouse, S.D., Zielinski, R.E. and Huber, S.C. (2012) Calcium/calmodulin inhibition of the Arabidopsis BRASSINOSTEROID-INSENSITIVE 1 receptor kinase provides a possible link between calcium and brassinosteroid signaling. *Biochem J.* 443: 515–523.
- Orozco-Cárdenas, M.L. and Ryan, C. (1999) Hydrogen peroxide is generated systemically in plant leaves by wounding and systemin via the octadecanoid pathway. *Proc. Natl Acad. Sci. USA* 96: 6553–6557.
- Pottosin, I.I. and Schönknecht, G. (2007) Vacuolar calcium channels. *J. Exp. Bot.* 58: 1559–1569.
- Sambrook, J. and Russell, D.W. (2001) *In Molecular Cloning: A Laboratory Manual* Cold Spring Harbor Laboratory Press, Cold Spring Harbor, NY.
- Schulz, P., Herde, M. and Romeis, T. (2013) Calcium-dependent protein kinases: hubs in plant stress signaling and development. *Plant Physiol.* 163: 523–530.
- Shi, B., Ni, L., Liu, Y.P., Zhang, A.Y., Tan, M.P. and Jiang, M.Y. (2014) OsDMI3-mediated activation of OsMPK1 regulates the activities of antioxidant enzymes in abscisic acid signaling in rice. *Plant Cell Environ.* 37: 341–352.
- Shi, B., Ni, L., Zhang, A.Y., Cao, J.M., Zhang, H., Qin, T.T. et al. (2012) OsDMI3 is a novel component of abscisic acid signaling in the induction of antioxidant defense in leaves of rice. *Mol. Plant* 5: 1359–1374.
- Shimoda, Y., Han, L., Yamazaki, T., Suzuki, R., Hayashi, M. and Imaizumi-Anraku, H. (2012) Rhizobial and fungal symbioses show different requirements for calmodulin binding to calcium calmodulin-dependent protein kinase in *Lotus japonica*. *Plant Cell* 24: 304–321.

- Singla, B., Chugh, A., Khurana, J.P. and Khurana, P. (2006) An early auxin-responsive Aux/IAA gene from wheat (*Triticum aestivum*) is induced by epibrassinolide and differentially regulated by light and calcium. *J. Exp. Bot.* 57: 4059–4070.
- Smedler, E. and Uhlén, P. (2014) Frequency decoding of calcium oscillations. *Biochim. Biophys. Acta* 1840: 964–969.
- Steber, C.M. and McCourt, P. (2001) A role for brassinosteroids in germination in *Arabidopsis*. *Plant Physiol.* 125: 763–769.
- Takeda, N., Maekawa, T. and Hayashi, M. (2012) Nuclear-localized and deregulated calcium- and calmodulin-dependent protein kinase activates rhizobial and mycorrhizal responses in *Lotus japonicas*. *Plant Cell* 24: 810–822.
- Tirichine, L., Imaizumi-Anraku, H., Yoshida, S., Murakami, Y., Madsen, L.H., Miwa, H. *et al.* (2006) Deregulation of a Ca<sup>2+</sup>/calmodulin-dependent kinase leads to spontaneous nodule development. *Nature* 441: 1153–1156.
- Wang, Z.Y. (2012) Brassinosteroids modulate plant immunity at multiple levels. *Proc. Natl Acad. Sci. USA* 109: 7–8.
- White, P.J. (2000) Calcium channels in higher plants. *Biochim. Biophys. Acta* 1465: 171–189.
- Witthöft, J. and Harter, K. (2011) Latest news on *Arabidopsis* brassinosteroid perception and signaling. *Front. Plant Sci.* 2: 58–61.
- Xia, X.J., Wang, Y.J., Zhou, Y.H., Tao, Y., Mao, W.H., Shi, K. *et al.* (2009) Reactive oxygen species are involved in brassinosteroid-induced stress tolerance in cucumber. *Plant Physiol.* 150: 801–814.
- Yang, C., Li, A.L., Zhao, Y.L., Zhang, Z.L., Zhu, Y.F., Tan, X.M. *et al.* (2011) Overexpression of a wheat CCaMK gene reduces ABA sensitivity of *Arabidopsis thaliana* during seed germination and seedling growth. *Plant Mol. Biol. Rep.* 29: 681–692.
- Yang, T., Du, L. and Poovaiah, B.W. (2007) Concept of redesigning proteins by manipulating calcium/calmodulin-binding domains to engineer plants with altered traits. *Funct. Plant Biol.* 34: 343–352.
- Yang, T. and Poovaiah, B.W. (2003) Calcium/calmodulin-mediated signal network in plants. *Trends Plant Sci.* 8: 505–512.
- Yoo, S.D., Cho, Y.H. and Sheen, J. (2007) *Arabidopsis* mesophyll protoplasts: a versatile cell system for transient gene expression analysis. *Nat. Protoc.* 2: 1565–1572.
- Zhai, Z., Sooksa-nguan, T. and Vatamaniuk, O.K. (2009) Establishing RNA interference as a reverse-genetic approach for functional analysis in protoplasts. *Plant Physiol.* 149: 642–652.
- Zhang, A.Y., Zhang, J., Ye, N.H., Cao, J.M., Tan, M.P., Zhang, J.H. *et al.* (2010) ZmMPK5 is required for the NADPH oxidase-mediated self-propagation of apoplastic H<sub>2</sub>O<sub>2</sub> in brassinosteroid-induced antioxidant defense in leaves of maize. *J. Exp. Bot.* 61: 4399–4411.
- Zhang, A.Y., Zhang, J., Zhang, J.H., Ye, N.H., Zhang, H., Tan, M.P. *et al.* (2011) Nitric oxide mediates brassinosteroid-induced ABA biosynthesis involved in oxidative stress tolerance in maize leaves. *Plant Cell Physiol.* 52: 181–192.
- Zhang, W.H., Rengel, Z. and Kuo, J. (1998) Determination of intracellular Ca<sup>2+</sup> in cells of intact wheat roots: loading of acetoxymethyl ester of Fluo-3 under low temperature. *Plant J.* 15: 147–151.
- Zhao, Y., Qi, Z. and Berkowitz, G.A. (2013) Teaching an old hormone new tricks: cytosolic Ca<sup>2+</sup> elevation involvement in plant brassinosteroid signal transduction cascades. *Plant Physiol.* 163: 555–565.
- Zhu, Y., Zuo, M.X., Liang, Y.L., Jiang, M.Y., Zhang, J.H., Scheller, H.V. *et al.* (2013) MAP65-1a positively regulates H<sub>2</sub>O<sub>2</sub> amplification and enhances brassinosteroid-induced antioxidant defense in maize. *J. Exp. Bot.* 64: 3787–3802.
